# Supplementary material
Source: PubMed Central journal article supplement (PMC9108009)

**A**

**Protease sites can regulate SNIPR signaling**

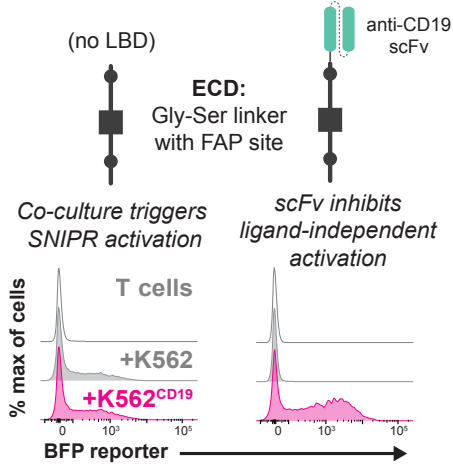

**B**

**Reporter construct with constitutive CAR**

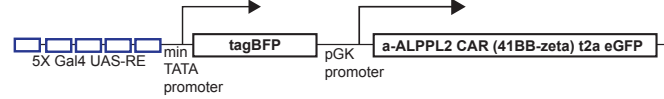

**C** Notch1  $\Delta$ NRR Notch2  $\Delta$ NRR Notch3  $\Delta$ NRR Notch4  $\Delta$ NRR

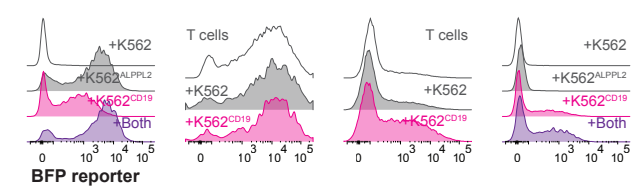

**D**

**SNIPRs built with hinges derived from clinical CARs**

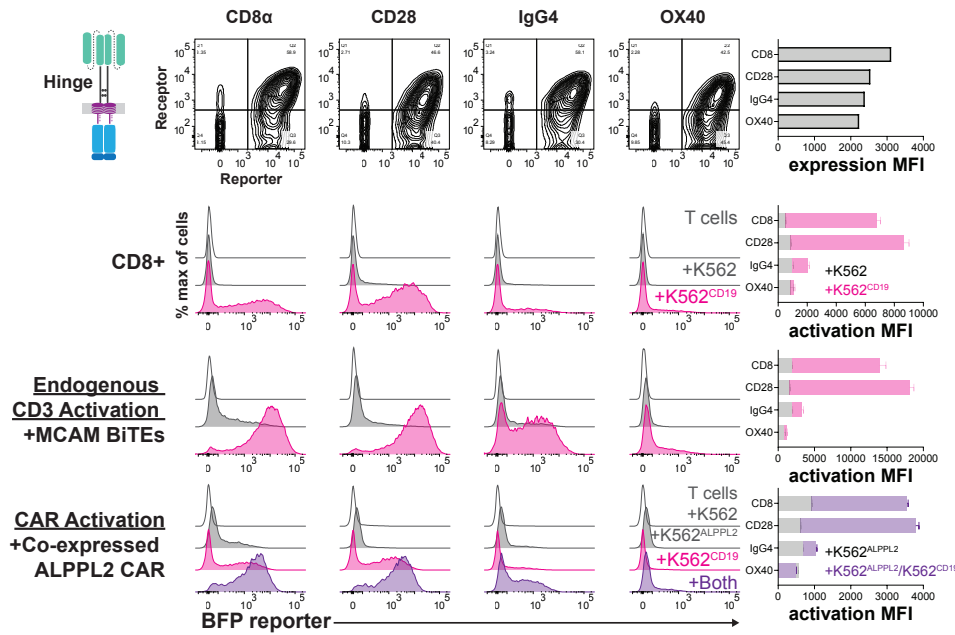

**E**

**Full-length CD8α hinge Notch receptor in CD4+**

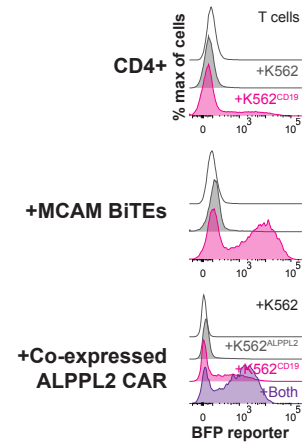

**F**

**The CD8α hinge ECD can be optimized through truncation**

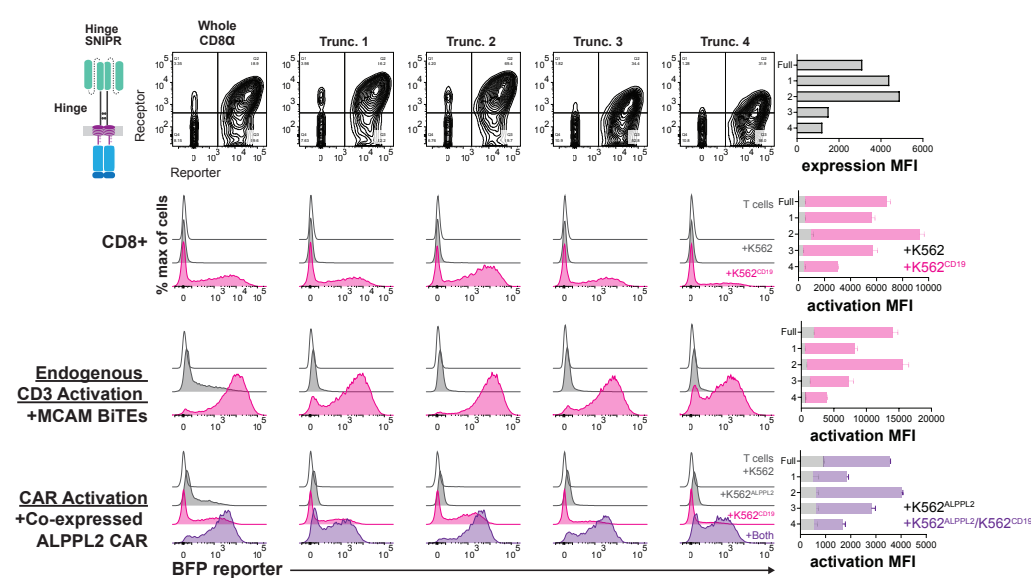

Supplement: NIHMS1796456-supplement-2.pdf [file NIHMS1796456-supplement-2.pdf]
