# Supplementary material
Source: PubMed Central journal article supplement (PMC9108009)

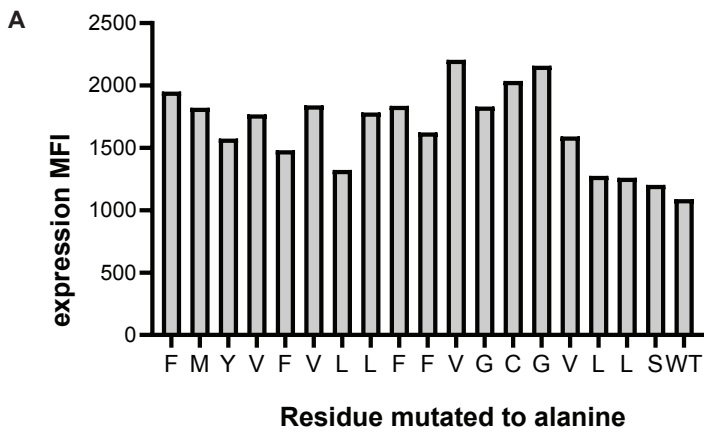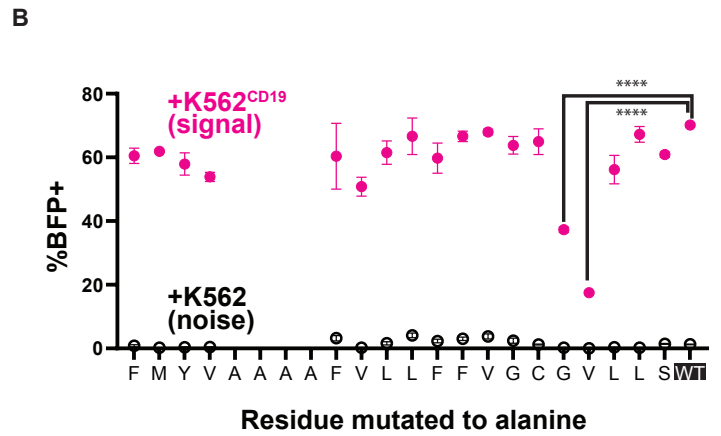

**C** Improve non-functional TMD through residue substitution

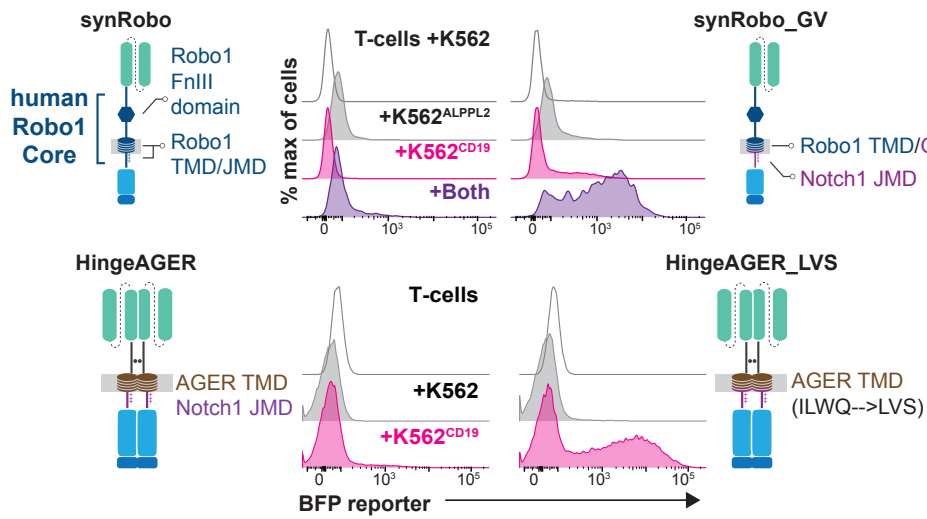

**D** Improve non-functional SNIPR through JMD swap

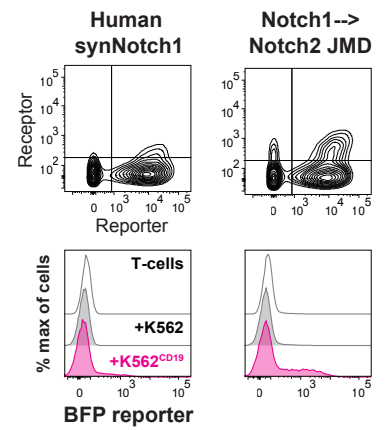

**E** Modular SNIPR assembly around a CLSTN2 core

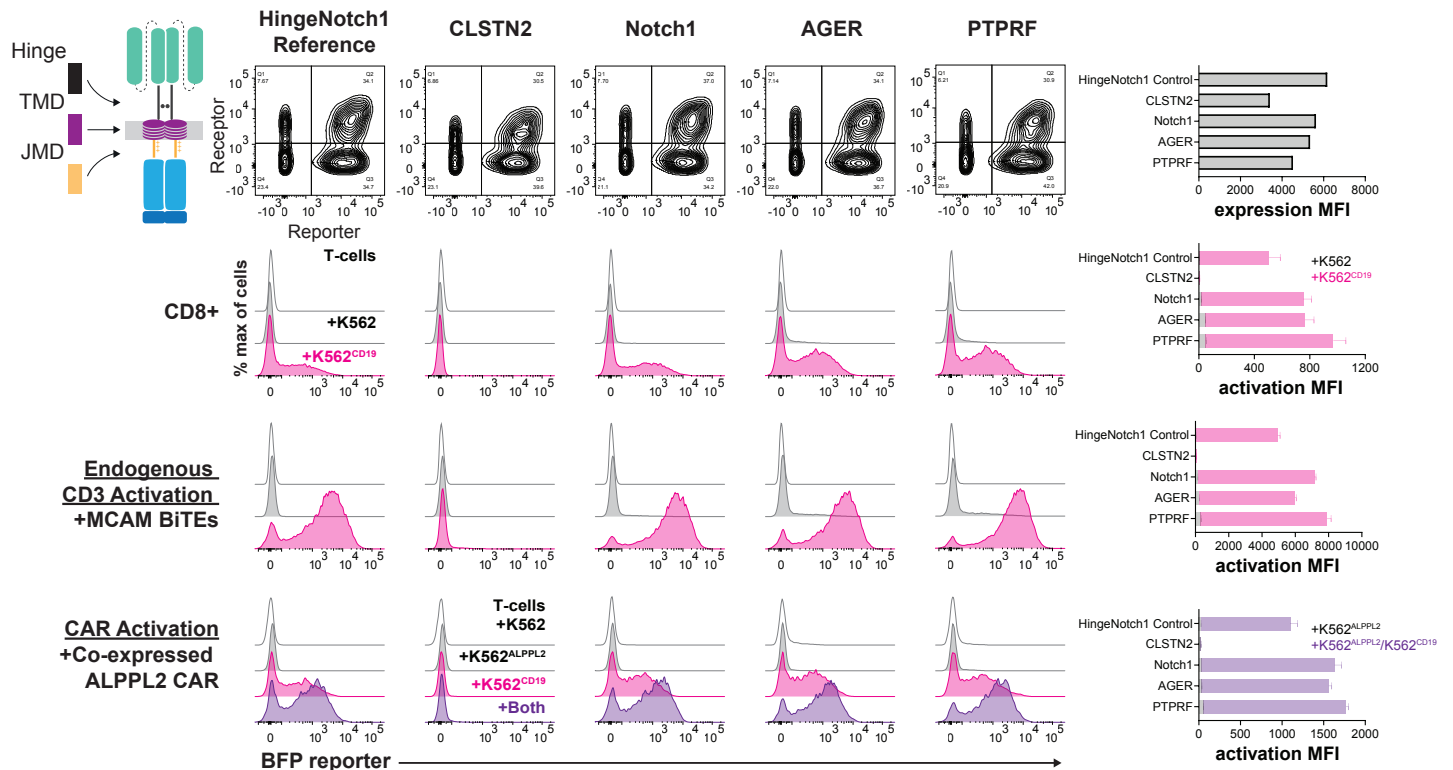

Supplement: NIHMS1796456-supplement-3.pdf [file NIHMS1796456-supplement-3.pdf]
