# Supplementary material
Source: PubMed Central journal article supplement (PMC9108009)

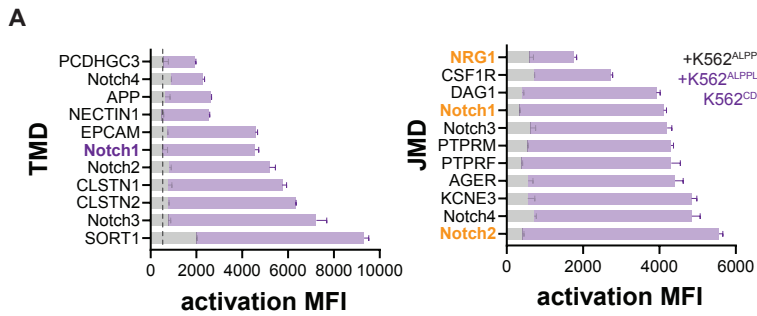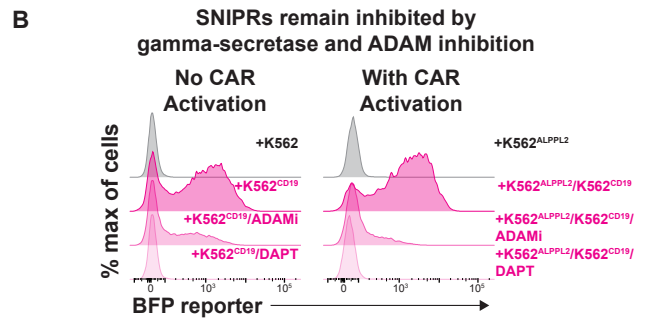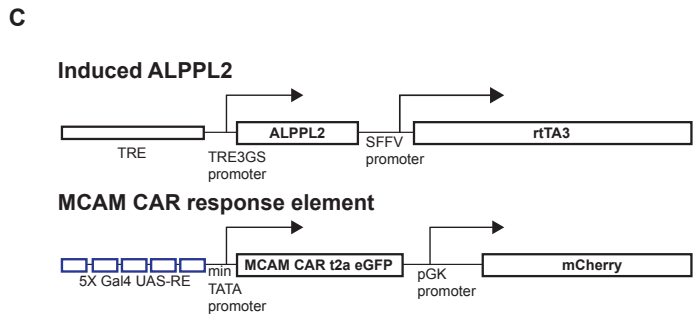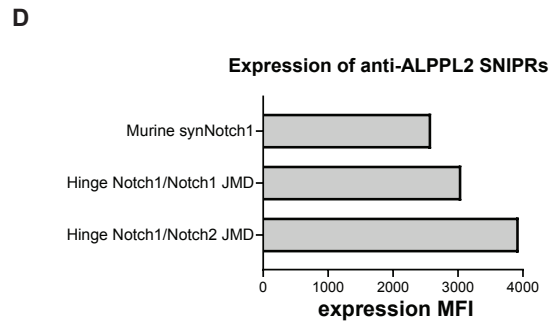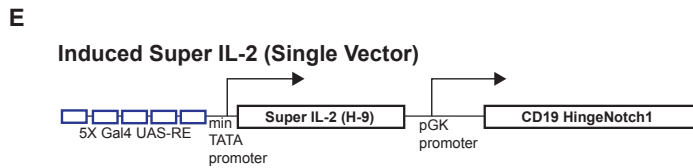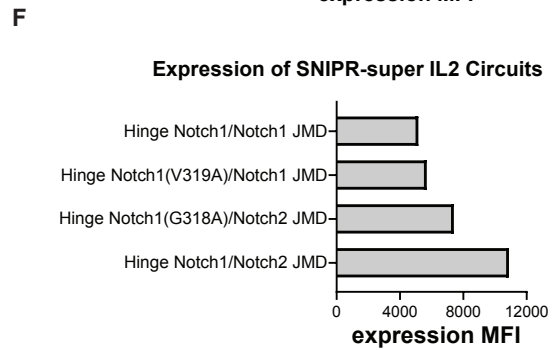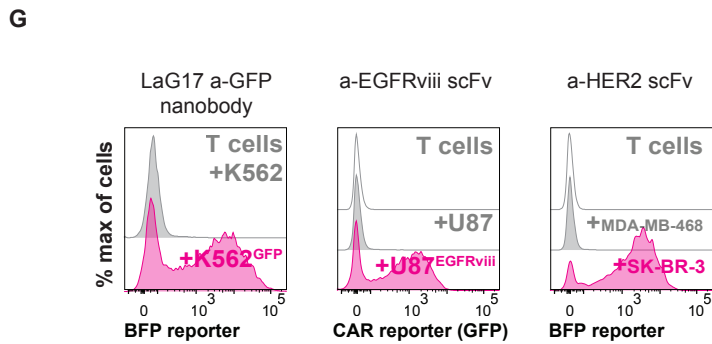

Supplement: NIHMS1796456-supplement-4.pdf [file NIHMS1796456-supplement-4.pdf]
